# Supplementary material
Source: PubMed Central journal article supplement (PMC6295154)
Supplement: NIHMS1506651-supplement-1.pdf [file NIHMS1506651-supplement-1.pdf]

### **Supplementary Note 1: Whole-cell FLIRT of the AB Cell**

To test whether FLIRT-induced thermal changes calculated from the mCherry bioassay for temperature calibration (see above) can inactivate *ts* mutant proteins *in vivo*, we used the 27  $\mu\text{m}$  mask to perform whole-cell FLIRT of one cell (AB) in 2-cell *C. elegans* embryos with a fast-acting *ts* mutation in myosin-II/NMY-2 (*nmy-2(ne3409ts)*)<sup>28, 29</sup>. Myosin-II is an actin motor protein required for constriction of the actomyosin contractile ring during cytokinesis, the physical division of one cell into two<sup>30-32</sup>. As expected, thermal upshift of *myosin-II(ts)* mutant embryos from 16°C to 25-26°C led to complete failure in cell division in all AB cells (0/10 AB cells divided successfully), whereas upshift to 22°C did not block cell division in AB (11/11 AB cells divided successfully)<sup>28, 29</sup>. To confirm our IR laser calibrations, we then used FLIRT to target the entire AB cell in control and *myosin-II(ts)* embryos to 22°C or 26°C, using a 27  $\mu\text{m}$  diameter mask. We found that 9.8 mW of laser power, corresponding to 26°C, caused division failure in the AB cell in *myosin-II(ts)* mutant embryos (0/14 AB cells divide successfully). Lower IR laser power (6.1 mW), corresponding to a permissive temperature (22°C), did not cause cytokinesis failure in the AB cell in *myosin-II(ts)* embryos (7/7 AB cells divide successfully).

**Supplementary Note 2: *Whole-cell upshift of the 2-cell embryo.***

Upon whole-embryo thermal upshift of 2-cell embryos from 16°C to 26°C, cytokinesis failed in both AB and P1 cells in *myosin-II(ts)* mutants (0/10 and 0/10 AB and P1 cell divided successfully). Thermal upshift to 26°C did not disrupt cytokinesis in control embryos (7/7 and 7/7 AB and P1 cell divided successfully).

## Supplementary Table 1: Statistical analysis results

Figure 2a

| Unpaired two-tailed t-test |                | Control        | Delta(ts)      |                |
|----------------------------|----------------|----------------|----------------|----------------|
|                            |                | P2-Abp (FLIRT) | P2-ABp (FLIRT) | P2-EMS (FLIRT) |
| Control                    | P2-ABp (FLIRT) |                | 1.76915E-09    | 0.691445126    |
| Delta(ts)                  | P2-ABp (FLIRT) |                |                | 7.10651E-09    |
|                            | P2-EMS (FLIRT) |                |                |                |

| Unpaired two-tailed t-test |                | Control        | Delta(ts)      |                |
|----------------------------|----------------|----------------|----------------|----------------|
|                            |                | P2-Abp (FLIRT) | P2-ABp (FLIRT) | P2-EMS (FLIRT) |
| Control                    | P2-ABp (FLIRT) |                | ****           | ns             |
| Delta(ts)                  | P2-ABp (FLIRT) |                |                | ****           |
|                            | P2-EMS (FLIRT) |                |                |                |

Figure 2b

| Unpaired two-tailed t-test |                                       | p-value     | Significance |
|----------------------------|---------------------------------------|-------------|--------------|
| Control                    | FLIRT vs adjacent membrane partitions | 0.1341      | ns           |
| <i>cyk-4(ts)</i>           | FLIRT vs adjacent membrane partitions | 4.28098E-11 | ****         |

Supplemental Figure 6a

| Unpaired two-tailed t-test |            | during cell division |        | 2-cell stage |        |
|----------------------------|------------|----------------------|--------|--------------|--------|
|                            |            | 14°C                 | 16°C   | 14°C         | 16°C   |
| during cell division       | 14°C FLIRT | 0.2301               |        |              |        |
|                            | 16°C FLIRT |                      | 0.1037 |              |        |
| 2-cell stage               | 14°C FLIRT |                      |        | 0.3917       |        |
|                            | 16°C FLIRT |                      |        |              | 0.4883 |

| Unpaired two-tailed t-test |            | during cell division |      | 2-cell stage |      |
|----------------------------|------------|----------------------|------|--------------|------|
|                            |            | 14°C                 | 16°C | 14°C         | 16°C |
| during cell division       | 14°C FLIRT | ns                   |      |              |      |
|                            | 16°C FLIRT |                      | ns   |              |      |
| 2-cell stage               | 14°C FLIRT |                      |      | ns           |      |
|                            | 16°C FLIRT |                      |      |              | ns   |



Supplemental Figure 8c

| Unpaired two-tailed t-test |      | Control | cyk-4(ts) |             |
|----------------------------|------|---------|-----------|-------------|
|                            |      | 26°C    | 16°C      | 26°C        |
| Control                    | 26°C |         | 0.8974    | 5.9435E-18  |
| cyk-4(ts)                  | 16°C |         |           | 3.67078E-17 |
|                            | 26°C |         |           |             |

| Unpaired two-tailed t-test |      | Control | cyk-4(ts) |      |
|----------------------------|------|---------|-----------|------|
|                            |      | 26°C    | 16°C      | 26°C |
| Control                    | 26°C |         | ns        | **** |
| cyk-4(ts)                  | 16°C |         |           | **** |
